# Supplementary material
Source: Springer Nature journal article supplement (https://www.springermedizin.de/resource/supplementary/12885_2009_2570_MOESM12_ESM.pdf/9462584)

**A**

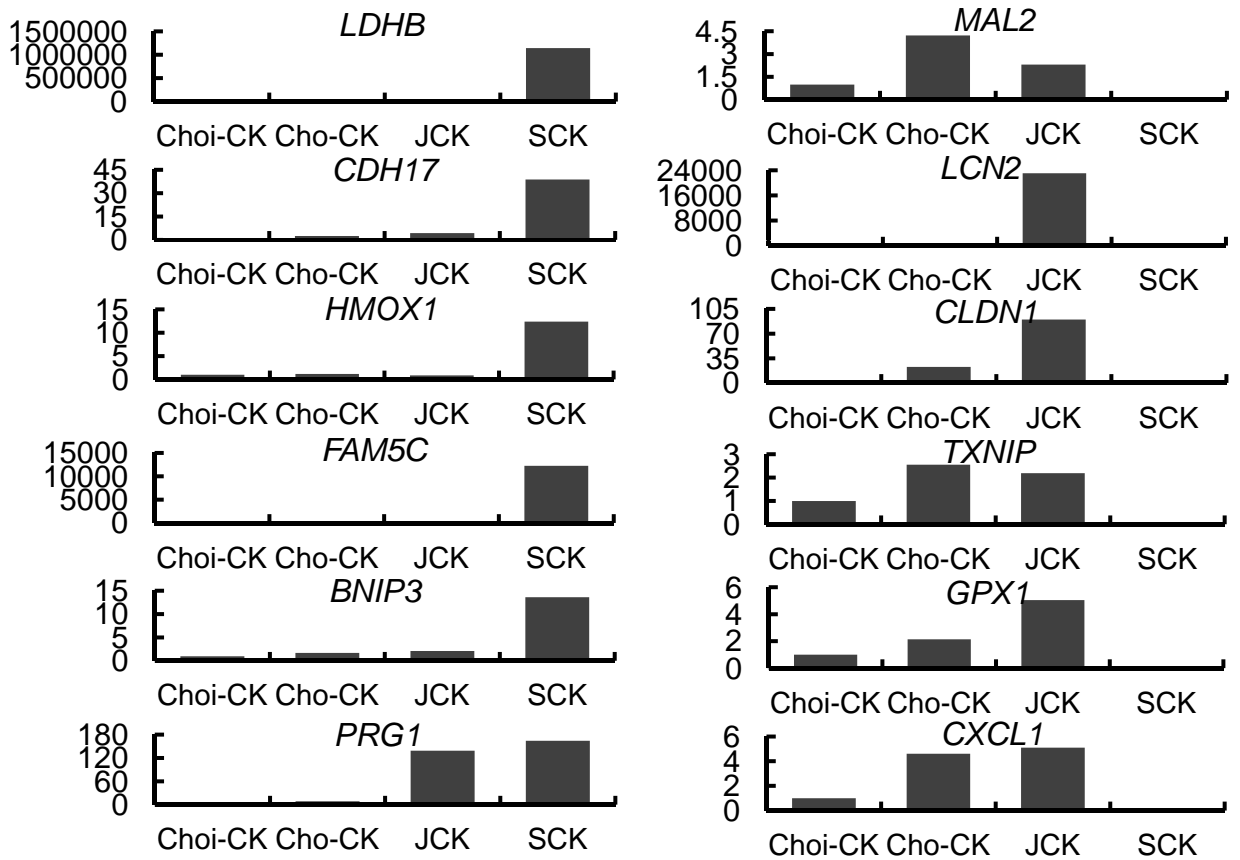

**B**

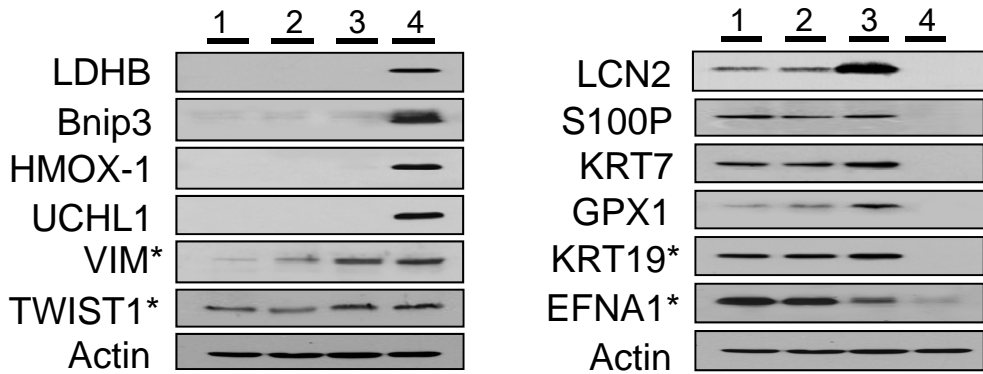

**C**

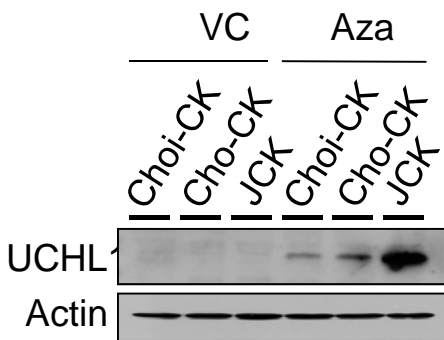

**D**

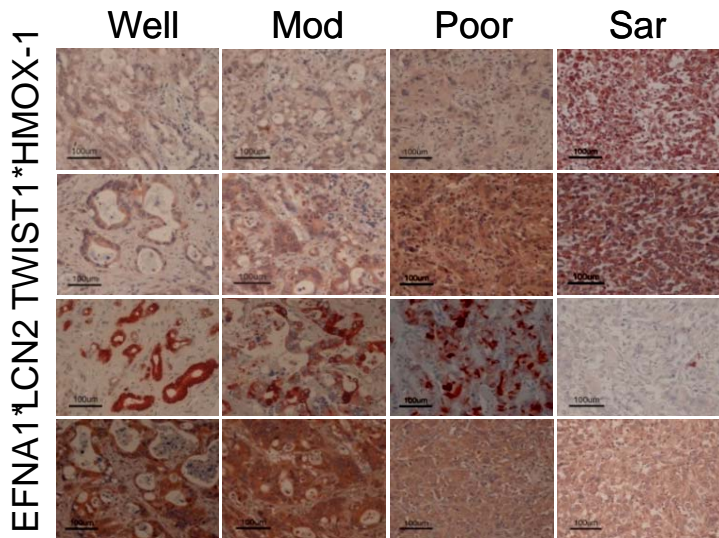

Supplement: MOESM12 [file 9462584]
